# Supplementary material for: Prevalence and MRI findings of incidentally detected pituitary non-enhancing lesion on brain MRI in children
Source: publisher site journal article supplement (doi:10.1515/jpem-2020-0518), 2021-04-05

**­­­­­­­Supplementary material**

Supplemental Table 1. Representative brain MRI protocols and imaging parameters on 1.5-T MRI scanners.

| Field strength | 1.5T | | | | | | | | | |
| --- | --- | --- | --- | --- | --- | --- | --- | --- | --- | --- |
| Sequences | Pre- and  post-contrast  3D T1WI a, b | 2D T1WI b | | | T2WI | | FLAIR | DWI | SWIc |
| Imaging plane | sagittal | sagittal | axial | coronal | axial | coronal | axial | axial | axial |
| Slice thickness (mm) | 0.7 | 5 | 5 | 5 | 5 | 5 | 5 | 5 | 5 |
| Interslice spacing (mm) | 0 | 1.5 | 1 | 1.5 | 1.5 | 1 | 1.5 | 1.5 | 1.5 |
| TR (ms) | 7.7 | 450 | 575 | 625 | 4550 | 4000 | 8000 | 8000 | 700 |
| TE (ms) | 2.9 | 13 | 18.6 | 17.3 | 76.7 | 87.1 | 80.9 | 70.1 | 15 |

NOTE. The field of view varied from 22 × 22 cm to 24 × 24 cm, depending on the patient’s head size. The MR acquisition techniques varied according to the patient’s clinical condition or schedule. T1WI = T1-weighted imaging, T2WI = T2-weighted imaging, FLAIR = fluid attenuated inversion recovery imaging, SWI = susceptibility-weighted imaging, T2*-weighted GRE = T2*-weighted gradient recalled echo, DWI = diffusion-weighted imaging.

a Pre- and post-contrast sagittal 3D T1WI using a sagittal isovoxel ultrafast spoiled gradient echo T1WI technique and reconstructed at slice thicknesses of 1 or 2 mm in all three planes. Post-contrast 3D T1WI was acquired using the same parameters as pre-contrast 3D T1WI.

b T1WI performed using a 2D or 3D technique.

c Either SWI or T2*-weighted GRE was acquired in one MRI examination.

Supplemental Table 2. Representative brain MRI protocols and imaging parameters on 3-T MRI scanners.

| Field strength | 3T | | | | | | | | | |
| --- | --- | --- | --- | --- | --- | --- | --- | --- | --- | --- |
| Sequences | Pre- and  post-contrast  3D T1WI a, b | 2D T1WI b | | | T2WI | | FLAIR | DWI | SWIc |
| Imaging plane | Sagittal | sagittal | Axial | Coronal | axial | coronal | axial | axial | axial |
| Slice thickness (mm) | 0.7 | 5 | 5 | 5 | 5 | 5 | 5 | 5 | 1.5 |
| Interslice spacing (mm) | 0 | 1.5 | 1.5 | 1.5 | 1.5 | 0 | 1.5 | 1.5 | 0 |
| TR (ms) | 9.9 | 442 | 406 | 495 | 3000 | 3000 | 9000 | 3500 | 30 |
| TE (ms) | 4.6 | 10 | 10 | 10 | 80 | 80 | 135 | 66 | 0 |

NOTE. The field of view varied from 22 × 22 cm to 24 × 24 cm, depending on the patient’s head size. The MR acquisition techniques varied according to the patient’s clinical condition or schedule. T1WI = T1-weighted imaging, T2WI = T2-weighted imaging, FLAIR = fluid attenuated inversion recovery imaging, SWI = susceptibility-weighted imaging, T2*-weighted GRE = T2*-weighted gradient recalled echo, DWI = diffusion-weighted imaging.

a Pre- and post-contrast sagittal 3D T1WI using a sagittal isovoxel ultrafast spoiled gradient echo T1WI technique and reconstructed at slice thicknesses of 1 or 2 mm in all three planes. Post-contrast 3D T1WI acquired using same parameters as pre-contrast 3D T1WI.

b T1WI using a 2D or 3D technique.

c Either SWI or T2*-weighted GRE was acquired in one MRI examination.

Supplemental Figure 1. A 2-year-old boy with seizure. Contrast-enhanced sagittal and axial (B) T1WI, showing an ovoid non-enhancing pituitary lesion between the anterior and posterior lobes (arrows). This non-enhancing lesion (arrows) was hypointense on both precontrast sagittal T1WI (C) and axial T2WI (D).


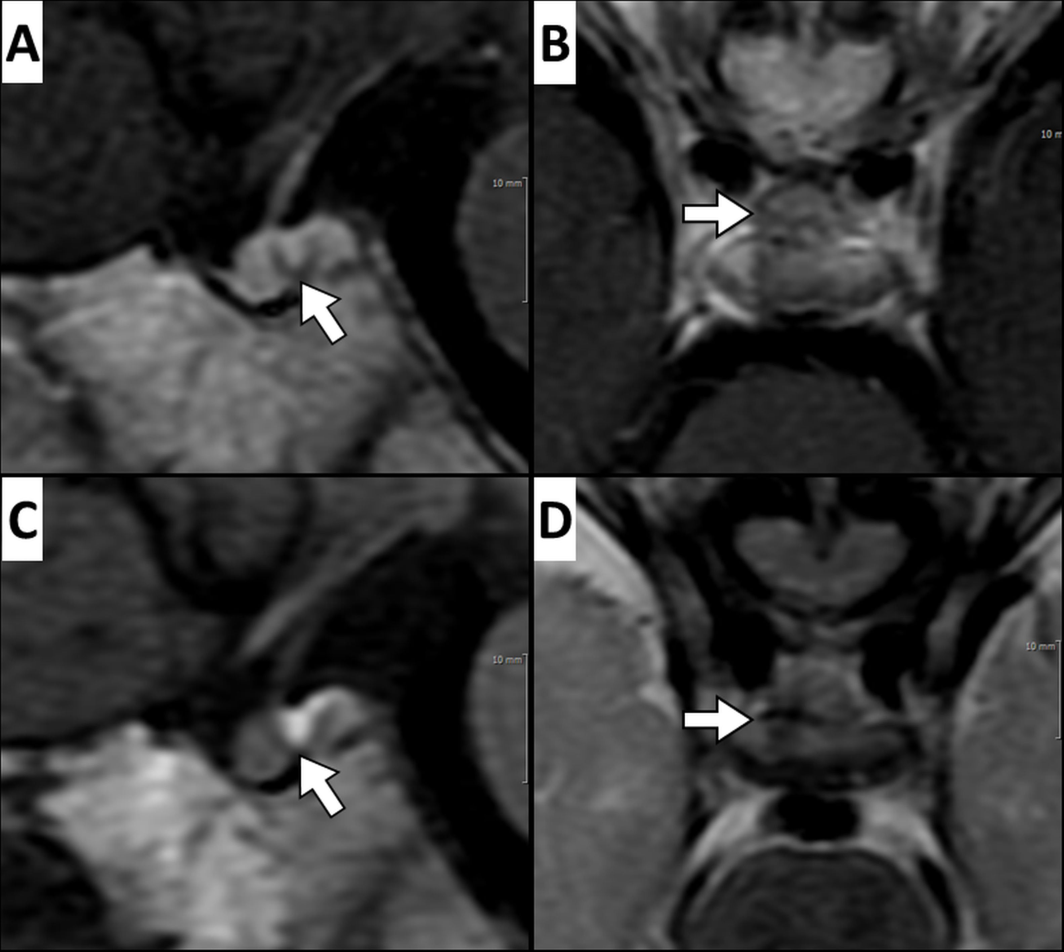


Supplemental Figure 2. A 7-year-old boy with seizure. Contrast-enhanced sagittal (A) and axial (B) T1WI showing a thin non-enhancing pituitary lesion between the anterior and posterior lobes (arrows) with the smallest diameter in the anteroposterior direction. The lesion (arrows) was isointense on sagittal T1WI (C) and hypointense on axial T2WI (D).


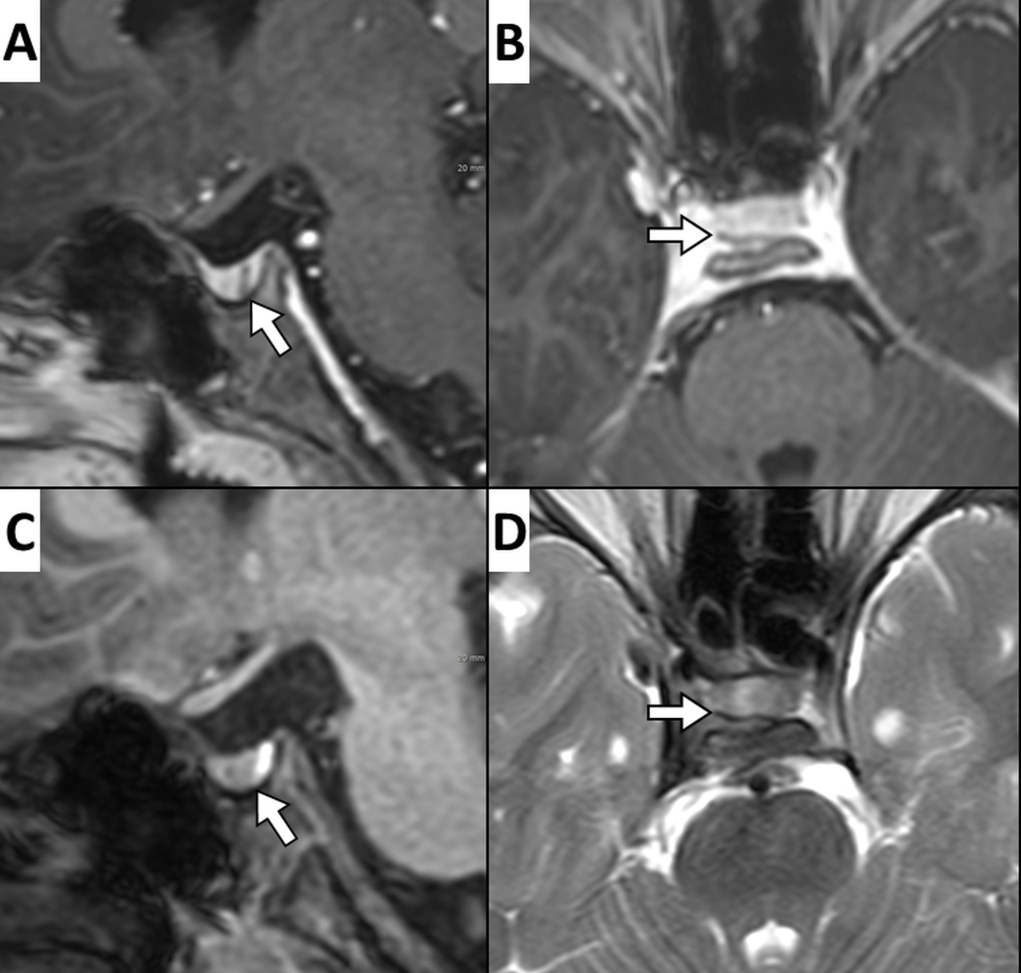


Supplemental Figure 3. A 6-year-old girl with seizure. Enhanced sagittal T1-weighted MRI (A) on a 1.5-T scanner, showing no evidence of a pituitary non-ennhancing lesion. Contrast-enhanced sagittal T1-weighted MRI (B) obtained 9 months later on a 3-T scanner showing a pituitary non-enhancing lesion (arrows).


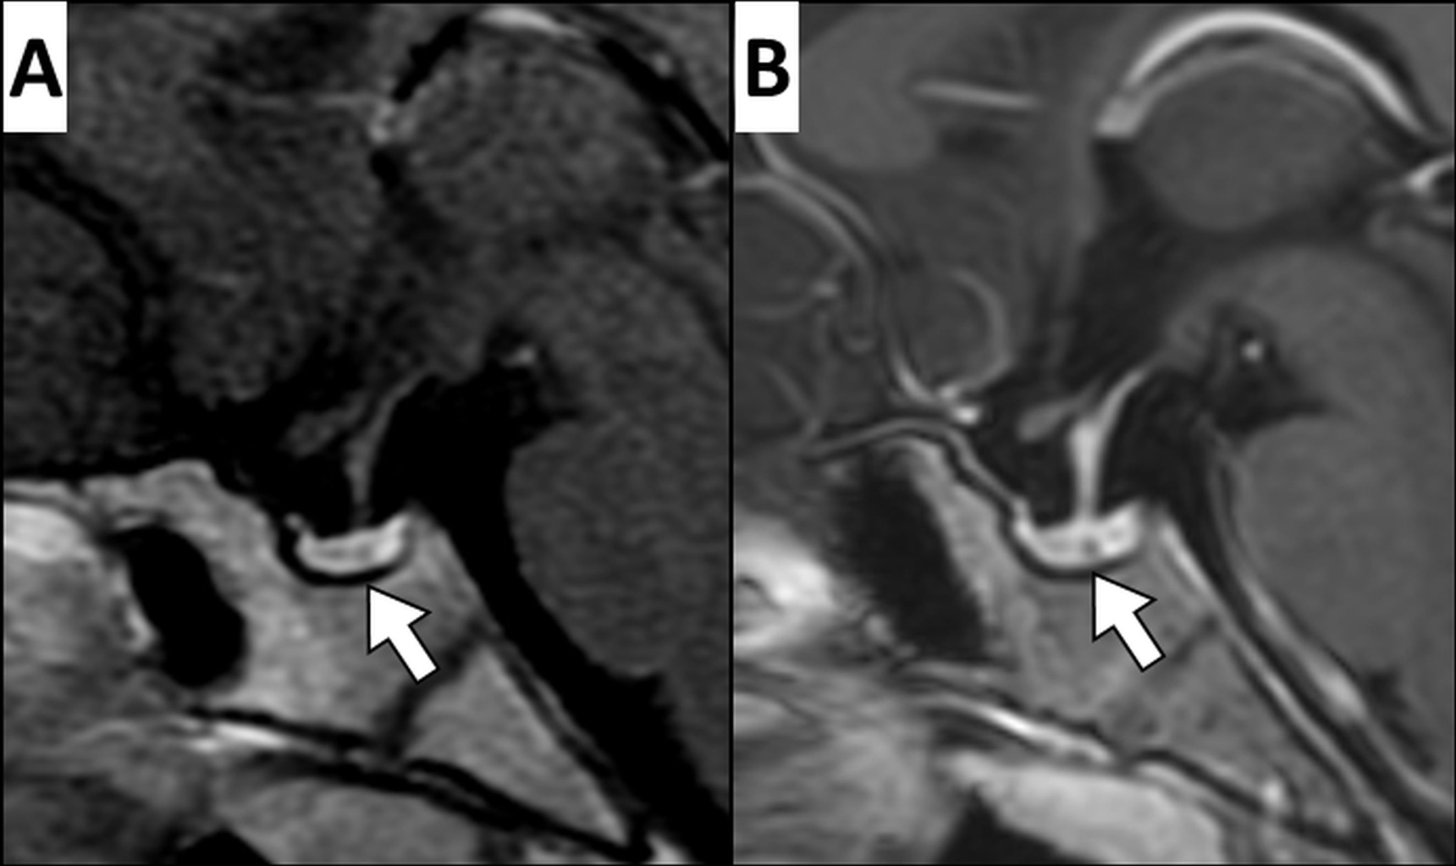

Supplement: Supplementary file 1 [file j_jpem-2020-0518_suppl.docx]
